# Supplementary material
Source: PubMed Central journal article supplement (PMC3370642)
Supplement: supp_194.11.2846_TableS1-S3.pdf [file supp_194.11.2846_TableS1-S3.pdf]

**Supplementary Table 1. Primers designed in this study.**

| Panel | APEC O1<br>genomic<br>island | APEC O1<br>gene locus | Product<br>size (bp) |   | Sequence (5' to 3')           |
|-------|------------------------------|-----------------------|----------------------|---|-------------------------------|
| 1     | 2                            | 1716                  | 533                  | F | CAGGGATTCGCTTGCCTCTTCTGTGTA   |
|       |                              |                       |                      | R | CGACCGCCGGGATTTTAACCATAC      |
|       | 2                            | 1718                  | 468                  | F | AGCGGTCACAGTGGCTTTCATAGGTG    |
|       |                              |                       |                      | R | GCCCCGCTTTTCCAGGCACAC         |
|       | 2                            | 1712                  | 392                  | F | TACCGGCGTGATGGCCACCTACA       |
|       |                              |                       |                      | R | AAACAACGCCGGTTCTGCCTACCAG     |
|       | 2                            | 1713                  | 366                  | F | CCGGCTCAGGAGAGTCTGTTAATACTACT |
|       |                              |                       |                      | R | TGATAGCCCGCTCCAGATTTTCTTTAG   |
|       | 2                            | 1717                  | 313                  | F | AAGCTATCCCGACTTGCTCTCGCTGTAA  |
|       |                              |                       |                      | R | AAGGCGCTGGCACTGCAACAACACTAC   |
|       | 2                            | 1724                  | 266                  | F | TTGACCTGTACCCGCATAAACACTGGTT  |
|       |                              |                       |                      | R | TGCGAGAGGTGCTTAACGCGATTTTC    |
|       | 2                            | 1721                  | 215                  | F | GGTGGCGAGATAACCGACGTAGTGGT    |
|       |                              |                       |                      | R | CCCCTGGCGAATGGAAAACAGAGAT     |

|   |    |      |     |   |                             |
|---|----|------|-----|---|-----------------------------|
| 2 | 1  | 1770 | 573 | F | GTCAGCCGCTGGACCCCCTATGAT    |
|   |    |      |     | R | TATCGCCGCTTCCCTCGCCTTATC    |
|   | 1  | 1767 | 529 | F | AGCGGCGTCCTGCTGCTTACTCTG    |
|   |    |      |     | R | CCGGCACCGGGGAGAAAATGA       |
|   | 1  | 1756 | 446 | F | CTGGCCCAACCCACCGTTATCTT     |
|   |    |      |     | R | ATGGCCGGGTACGGGTGAAGTTTC    |
|   | 1  | 1757 |     | F | ATCGGCACCAGAAGTACCGGATTTGA  |
|   |    |      |     | R | GTCGGCAATATCTACGTGCAGGGACAC |
|   | 1  | 1753 | 358 | F | CCCCACAGGCCGCTCCACAG        |
|   |    |      |     | R | TGCCCGATAGGCGAAGATGGGTTAT   |
|   | 1  | 1761 | 310 | F | GGAGGCGGCGGGTTTTGACAA       |
|   |    |      |     | R | GTATTCCGCCATCCGCCCATCC      |
|   | 1  | 1772 | 250 | F | CTGAGCCGTGCGCAGAATGTCAAC    |
|   |    |      |     | R | ACTCTTCCGCCTGCCCTGGACTGT    |
| 3 | 40 | 2277 | 681 | F | TGAATGCCCGTATGACAAAGTAGGA   |
|   |    |      |     | R | GTTGCTTTGCGCTTGTCTTTTAGTCC  |
|   | 40 | 2301 | 561 | F | ATCAGCGCGGCGACTTTACGGTTAGT  |
|   |    |      |     | R | CCTGCGGCAGATTATCTCCCAGTGTG  |

|   |    |      |     |   |                             |
|---|----|------|-----|---|-----------------------------|
|   | 40 | 2271 | 501 | F | TGGGCCCGGGCAACCACAA         |
|   |    |      |     | R | TGAGGGGGCTGCCAGTGAAAATGAC   |
|   | 40 | 2291 | 456 | F | CGCCGGTGCGCCCAACTG          |
|   |    |      |     | R | GCGATTTCCGCCGCCGTCTT        |
|   | 40 | 2310 | 391 | F | GTCACGGGAATGGCTTAATACACAGG  |
|   |    |      |     | R | GAGACCGCCTTTATTCCTTTCTGAGG  |
|   | 40 | 2264 | 260 | F | GCTACCGCGGAGATGGGGATTAT     |
|   |    |      |     | R | CACGCGTTGCGGGTAGGTTTCA      |
|   | 40 | 2314 | 164 | F | GGCCCGCCGCAGACGCAGCATA      |
|   |    |      |     | R | ACCGGCACACCTCCCGCAGTGAACG   |
| 4 | 42 | 2103 | 404 | F | CCTGGGGCAGTGCGAGCAACTTG     |
|   |    |      |     | R | CGGCGCACATAAATACCCTGGCTACAC |
|   | 42 | 2101 | 445 | F | ATATGGGCGAATCGGAAGTGGCAGTT  |
|   |    |      |     | R | AGGCCGATGAATGCGCAAACCAAC    |
|   | 42 | 2099 | 503 | F | GGGAGCGCGTGCGGATGGTT        |
|   |    |      |     | R | ATTGCCGGCTCGTCCTTCCTTTTGA   |
|   | 42 | 2095 | 338 | F | GATTGCCGAATGTGCCGAGCGTAAA   |
|   |    |      |     | R | GTGCGCCGACGGCTAATTCTTCAATC  |

|   |    |      |     |   |                               |
|---|----|------|-----|---|-------------------------------|
|   | 42 | 2093 | 556 | F | GGGGGCGGATGAAGAAAATAAAAACTG   |
|   |    |      |     | R | TGCCCGTCCGCAAACCAACAG         |
|   | 42 | 2080 | 250 | F | AGGCCGATCTGGTGCGCAATTTTATTC   |
|   |    |      |     | R | AGCCGATCTACGCCTTTTTTCAGCAACAC |
|   | 42 | 2078 | 595 | F | GGGTGCAGCGGTGAGAGGAAAATAACT   |
|   |    |      |     | R | GCGGGCTAAGGCGTTGTTGACCTG      |
|   | 42 | 2071 | 298 | F | TTGTCGCCCGAAAATAACGCTAAACC    |
|   |    |      |     | R | AATGCGGGCGCTGGCCATGATTACC     |
|   | 42 | 2068 | 211 | F | AGCCGGGAAATTATCAGCCTGGCACTT   |
|   |    |      |     | R | CTTCGCCTTCGAGCACTTCCTGGATGT   |
| 6 | 3  | 1696 | 352 | F | TAGCGGCCTACGCGTGCCTGAT        |
|   |    |      |     | R | GGGCGATTAAGCCGGAACCACT        |
|   | 30 | 3040 | 397 | F | ATCGGGCCGACAAAATCAGTCCAC      |
|   |    |      |     | R | ATGGCCGACGGTTATTGCCTTAGC      |
|   | 30 | 3030 | 515 | F | CCGCGCTGAAATCATGGGTCGTAG      |
|   |    |      |     | R | TGGGGCGGATACTGACTGGAGCAC      |
|   | 30 | 3032 | 298 | F | CGCCAACGCCCGGTAATCCTC         |
|   |    |      |     | R | GCCGCCGGGACCGTTTGAGAT         |

|   |    |      |     |   |                                |
|---|----|------|-----|---|--------------------------------|
|   | 30 | 3034 | 269 | F | CAAGCCCCTCTACCGAGCCATCTT       |
|   |    |      |     | R | TCATGCCGGAGTGGTTCGTATTGA       |
|   | 30 | 3038 | 453 | F | TCGCCCCGCTGATCGCGTGTA          |
|   |    |      |     | R | CCGCCACCATTAGCCGTCTTTGTG       |
|   | 3  | 1694 | 605 | F | AAAAGCCGCTGGTGCTGTCTCTGC       |
|   |    |      |     | R | AAGCGGCCCGGCAACAACTTC          |
|   | 3  | 1698 | 234 | F | GGTATTACGCGGGCCGCATTGTC        |
|   |    |      |     | R | CCTTGCTGCAACACGGGAGGAAT        |
| 7 | 8  | 4460 | 410 | F | AGCCGGGCGGTCATGCTGAGTTATGGATTA |
|   |    |      |     | R | CCAGCGAGGAACGGCAAGATGCTTACCAA  |
|   | 8  | 4464 | 355 | F | ATCGCCGCGCCTCGGAGTCCTGT        |
|   |    |      |     | R | CTCCACGCGCCAGCGCCTCAAG         |
|   | 8  | 4467 | 463 | F | CGAGGTCGGCGTGGCTGGCTTCCT       |
|   |    |      |     | R | TCCCGCCCGGTCTGGATTGGTTACGAC    |
|   | 8  | 4468 | 277 | F | ACCGCCCTGACCGAAAAGGTGAAATCCATT |
|   |    |      |     | R | CTTTACTGCGGCGCTGCTGGGTCAGACTTT |
|   | 8  | 4472 | 317 | F | GCCGCAAATCCGGGACTGGCTGAACT     |
|   |    |      |     | R | ATACCGCACACCGCAGGCAGTGACAGG    |

|   |    |      |     |   |                                 |
|---|----|------|-----|---|---------------------------------|
|   | 8  | 4480 | 515 | F | CGCGCAGTTTTGACGGGCGAATGAC       |
|   |    |      |     | R | GACCCGGCGACGCTTAAGCCCTCAAAC     |
|   | 8  | 11   | 227 | F | GGCCGCTGTGGGAATTAATACCCGCAATCT  |
|   |    |      |     | R | CCGCCGCCGCAATCCCCACAC           |
|   | 8  | 12   | 159 | F | TATGCGCCAGACGCTGCCACACCAGAC     |
|   |    |      |     | R | CCGCCGGTCAGTTCGGGATAAAGCACAC    |
| 8 | 13 | 516  | 404 | F | TTTTTGCATTGGTGGCGGAGCGTGGTAT    |
|   |    |      |     | R | TATCGGCCAGGCGGGGAGTAAGTTTGT CAT |
|   | 13 | 517  | 308 | F | GTCGCGTTATGGCGGCTGAAGTGCTCAA    |
|   |    |      |     | R | GCCCGACGGCTCATAAACAGGCGTATCAA   |
|   | 13 | 520  | 495 | F | TATGAGGGGCAAGGTGCGACAGCTAACAGC  |
|   |    |      |     | R | ACGCCGGGCGGCAGCCTTATCCT         |
|   | 13 | 522  | 437 | F | ATCCGCCATATTATGCCCCGTGAGTTGAA   |
|   |    |      |     | R | AGAAGTTTAGCGCCGGCATGACGCATCTG   |
|   | 13 | 525  | 236 | F | GTACCGGGGCCGTCAGCTCCGAATACC     |
|   |    |      |     | R | ACGGCGCGGAAGCACCGAAATACA        |
|   | 13 | 530  | 364 | F | TGTCCCCGCAGGTTCTGGTTCAA AACTCAT |
|   |    |      |     | R | GAGCCATCCGGGAGCCACCAATCTCATTAT  |

|    |    |      |     |   |                                 |
|----|----|------|-----|---|---------------------------------|
|    | 13 | 532  | 532 | F | TGGCTGCGGCGCTAAGAAATCTTGAACAAC  |
|    |    |      |     | R | GCCGGGCCAATCCCACCGAACATA        |
| 9  | 17 | 1177 | 197 | F | CGCCGTCGCTGCGGGTGATGGTAA        |
|    |    |      |     | R | GTCACTGGCCGGAATTTAAATCCCGCACAT  |
|    | 17 | 1179 | 242 | F | CTGCCGTGCCTTTTCAAGTGCATGACCAGT  |
|    |    |      |     | R | CCGGCGAAGCGGAAACACGAATGAGTAA    |
|    | 17 | 1180 | 322 | F | CGCGCCCTGAAAACCGGCCATAACC       |
|    |    |      |     | R | GCGCCAGTGTGGACGGGGTGGAGA        |
|    | 17 | 1181 | 443 | F | AGCGCCCTTA ACTCTGCCTGGCTGAATGAG |
|    |    |      |     | R | AGCCAGCCGTTTATTTCCCGAATCCTGTCC  |
|    | 17 | 1184 | 285 | F | CGCCGCGAGGCAATTTGCGTAGTTCAC     |
|    |    |      |     | R | ATGCGCTCAAAGAGGATGGCGACGAAAGAG  |
|    | 17 | 1185 | 495 | F | AGGAAACACAACGCGTGGCTGACGGGTAAG  |
|    |    |      |     | R | TCGCGGGGAGGTGCTTTGATGTCCTGTT    |
| 10 | 20 | 4059 | 268 | F | AAATTACCGCCCCAGCCAAAGCCCCTAAAG  |
|    |    |      |     | R | GCCCCACTCTGCTGGCTCGTTCTGTAAA    |
|    | 20 | 4055 | 377 | F | GCGGTGGGCGTTCTGCGGATTCC         |
|    |    |      |     | R | GGCGCGGGCAGAGTATAGACGCATTGGTT   |

|    |    |      |     |   |                                 |
|----|----|------|-----|---|---------------------------------|
|    | 20 | 4053 | 443 | F | CCGCGAGAGTTAATAAATCTGCCGACACCA  |
|    |    |      |     | R | GCTGCGGCGGTAAC TTCTCTACAGGGTTTT |
|    | 20 | 4051 | 408 | F | TCCCTGCGTCGAAATCCCTCTGCTCTGAAC  |
|    |    |      |     | R | GCGGCGGCCACTATGGGGGCTACC        |
|    | 20 | 4041 | 512 | F | CCGCCATCCCCATCGCCATCATTGT       |
|    |    |      |     | R | GCGGCAGACCATCAACAGCGCCTACTTC    |
|    | 20 | 4038 | 322 | F | TAGTCCGGCGAATGCCTCAGTGTTGTGCTC  |
|    |    |      |     | R | TCCAGAGACGCGCTATCAGCCGCTTATGCT  |
|    | 20 | 4030 | 214 | F | CTGTGTCCGGAGGCGTACTCATGGGTTCTG  |
|    |    |      |     | R | AGATTCCCGTGGCGGCATCCGGTTATGTA   |
|    | 20 | 4022 | 584 | F | AGGATCGCGGTTTCGCAGGGACCAATGTA   |
|    |    |      |     | R | GGCGGGCGAACAGTTCAATGCGAGAAAC    |
| 11 | 4  | 1684 | 379 | F | CATTTCCCGCGGTGGTATGTTTCTGTTT    |
|    |    |      |     | R | GATATCAGCGGTAAAGCGAGCGGTGACT    |
|    | 4  | 1683 | 422 | F | CCGGGAAGCGTTCTGACATGACGATTGT    |
|    |    |      |     | R | ACCAGCGCAGTTCGCAGCTCTATCAACC    |
|    | 4  | 1682 | 340 | F | CACCGCATCCCGTATAGAGCAGCCTGAA    |
|    |    |      |     | R | TGCCTGACCGGTGACTCCGACTGGTT      |



|    |       |      |     |   |                              |
|----|-------|------|-----|---|------------------------------|
|    | 4     | 1681 | 227 | F | CACCCCTTTAAAACGAGCAGCATTACTG |
|    |       |      |     | R | AACGCCGCCCTATCAGCAGACAACATTT |
|    | 5     | 1665 | 489 | F | AATCCCCCGGTCAGCCAAGTGCTAACTG |
|    |       |      |     | R | CGACGGCCGCGAGTGCGTAACC       |
|    | 5     | 1664 | 273 | F | GCGGGATCTGCGTGGTCTTCGTCAGT   |
|    |       |      |     | R | CGCCCGCTTCCACCCGCAAGTTA      |
|    | 5     | 1663 | 158 | F | GCGGGCGGCATCGGCATTTTACT      |
|    |       |      |     | R | CACGGCGGAAAGTCGTACAGCCACAC   |
|    | 5     | 1662 | 527 | F | GTGATGGCGTGGGTGGCGACTCAGTATC |
|    |       |      |     | R | GCCGCGAGGATTGACACCAGCAAGTAAG |
| 12 | 13_14 | 542  | 552 | F | CTTCGCCACCGGGAAAGAATGTAG     |
|    |       |      |     | R | TTGCCGCTCTGACAGGTGGACTTA     |
|    | 13_14 | 545  | 512 | F | CAGGGCGTTGTTGGGTCGTATTTG     |
|    |       |      |     | R | AGTTGCCCGCTTTCTTCAGACAGA     |
|    | 13_14 | 544  | 465 | F | TGCGGTAAATCAACGAGGGCTTCT     |
|    |       |      |     | R | AGTAATCCCGCGACACCGTATCA      |
|    | 13_14 | 523  | 429 | F | GCTGGGGGATACCAATGAGCAGAT     |
|    |       |      |     | R | CCGGCCACCACGCCATCC           |

|  |       |     |     |   |                          |
|--|-------|-----|-----|---|--------------------------|
|  | 13_14 | 543 | 390 | F | TGATTTTGCCGGGTATTTCTTTTG |
|  |       |     |     | R | TCGGACGCGATGCCACTGT      |
|  | 13_14 | 518 | 335 | F | TCGGGTGGATCGCAACTATGACCA |
|  |       |     |     | R | CGCCGCTGTTTTTCTGCGTCTGT  |

**Supplementary Table 2. Prevalence of APEC O1 genomic island (GI)-associated genes among various *Escherichia coli***

**groups.** Cells are colored based upon prevalence (blue = 0-25%, green = 25-50%, orange = 50-75%, red = 75-100%). Statistical comparisons between groups are presented to the right, with cells with P < 0.05 (by Fisher's exact test) shaded yellow.

| GI | ORF <sup>A</sup> | Predicted protein                                                    | Gene       | Pathotype         |                   |                   |                   | P value             |                     |                     |                     |
|----|------------------|----------------------------------------------------------------------|------------|-------------------|-------------------|-------------------|-------------------|---------------------|---------------------|---------------------|---------------------|
|    |                  |                                                                      |            | APEC <sup>B</sup> | AFEC <sup>B</sup> | UPEC <sup>B</sup> | NMEC <sup>B</sup> | APEC<br>vs.<br>AFEC | APEC<br>vs.<br>UPEC | APEC<br>vs.<br>NMEC | UPEC<br>vs.<br>NMEC |
|    |                  |                                                                      |            |                   |                   |                   |                   |                     |                     |                     |                     |
| 1  | 1753             | putative endopeptidase                                               |            | 7.5               | 1.9               | 39.5              | 74.3              | 0.029               | 0.000               | 0.000               | 0.000               |
|    | 1756             | type VI secretion system protein                                     |            | 10.0              | 0.9               | 60.0              | 71.4              | 0.001               | 0.000               | 0.000               | 0.113               |
|    | 1757             | hemolysin co-regulated protein; type VI secretion system protein     | <i>hcp</i> | 15.9              | 12.3              | 55.5              | 77.1              | 0.452               | 0.000               | 0.000               | 0.002               |
|    | 1761             | type VI secretion system protein                                     |            | 9.7               | 2.8               | 44.0              | 77.1              | 0.019               | 0.000               | 0.000               | 0.000               |
|    | 1767             | type VI secretion system ATPase                                      |            | 10.4              | 0.9               | 49.0              | 71.4              | 0.001               | 0.000               | 0.000               | 0.001               |
|    | 1770             | type VI secretion system protein, associated with macrophage killing |            | 9.5               | 2.8               | 49.0              | 71.4              | 0.029               | 0.000               | 0.000               | 0.001               |
|    | 1772             | type VI secretion system effector protein                            |            | 11.1              | 6.6               | 45.5              | 77.1              | 0.213               | 0.000               | 0.000               | 0.000               |
| 2  | 1712             | vacuolating autotransporter                                          | <i>vat</i> | 71.9              | 13.2              | 64.5              | 82.9              | 0.000               | 0.065               | 0.059               | 0.004               |

|   |      |                                                |             |      |      |      |      |       |       |       |       |
|---|------|------------------------------------------------|-------------|------|------|------|------|-------|-------|-------|-------|
|   | 1713 | putative transcriptional regulator             |             | 31.0 | 4.7  | 63.5 | 78.6 | 0.000 | 0.000 | 0.000 | 0.026 |
|   | 1716 | conserved hypothetical protein                 |             | 9.1  | 8.5  | 1.5  | 7.1  | 1.000 | 0.000 | 0.820 | 0.030 |
|   | 1717 | conserved hypothetical protein                 |             | 12.6 | 10.4 | 2.0  | 8.6  | 0.622 | 0.000 | 0.431 | 0.021 |
|   | 1718 | conserved hypothetical protein                 |             | 2.4  | 1.9  | 0.0  | 1.4  | 1.000 | 0.022 | 1.000 | 0.259 |
|   | 1721 | conserved hypothetical protein                 |             | 11.9 | 6.6  | 2.5  | 5.7  | 0.122 | 0.000 | 0.153 | 0.244 |
|   | 1724 | conserved hypothetical protein                 |             | 8.4  | 3.8  | 0.0  | 2.9  | 0.150 | 0.000 | 0.145 | 0.067 |
| 3 | 1694 | putative attaching and effacing protein        | <i>eaeH</i> | 92.4 | 50.9 | 95.5 | 97.1 | 0.667 | 0.000 | 0.000 | 0.734 |
|   | 1696 | putative aldo/keto reductase                   |             | 41.8 | 16.0 | 81.5 | 88.6 | 0.231 | 0.000 | 0.000 | 0.196 |
|   | 1698 | putative LysR-like transcriptional regulator   |             | 28.7 | 17.9 | 79.0 | 88.6 | 0.459 | 0.000 | 0.000 | 0.106 |
| 4 | 1681 | putative site-specific recombinase             |             | 46.7 | 16.3 | 72.0 | 84.3 | 0.000 | 0.000 | 0.000 | 0.053 |
|   | 1682 | putative LuxR-like transcriptional regulator   |             | 46.7 | 16.3 | 71.0 | 84.3 | 0.000 | 0.000 | 0.000 | 0.038 |
|   | 1683 | conserved hypothetical protein                 |             | 46.7 | 12.5 | 69.0 | 84.3 | 0.000 | 0.001 | 0.000 | 0.013 |
|   | 1684 | putative autotransporter                       |             | 46.7 | 13.8 | 71.0 | 84.3 | 0.000 | 0.000 | 0.000 | 0.038 |
| 5 | 1662 | sugar ABC transporter, permease component      |             | 45.3 | 42.5 | 32.0 | 78.6 | 0.748 | 0.048 | 0.000 | 0.000 |
|   | 1663 | sugar ABC transporter, transmembrane component |             | 46.7 | 45.0 | 37.5 | 84.3 | 0.873 | 0.170 | 0.000 | 0.000 |
|   | 1664 | sugar ABC transporter, ATP-binding             |             | 46.7 | 45.0 | 38.0 | 84.3 | 0.873 | 0.215 | 0.000 | 0.000 |

|     |      |                                                      |             |      |      |      |      |       |       |       |       |
|-----|------|------------------------------------------------------|-------------|------|------|------|------|-------|-------|-------|-------|
|     |      | component                                            |             |      |      |      |      |       |       |       |       |
|     | 1665 | sugar ABC transporter, periplasmic-binding component |             | 45.3 | 45.0 | 35.5 | 84.3 | 1.000 | 0.163 | 0.000 | 0.000 |
| 8   | 4460 | phage-associated protein                             | <i>cox</i>  | 5.3  | 1.3  | 4.5  | 15.7 | 0.198 | 0.755 | 0.055 | 0.006 |
|     | 4464 | putative phage replication initiation protein        |             | 50.7 | 22.5 | 24.5 | 42.9 | 0.000 | 0.000 | 0.406 | 0.006 |
|     | 4467 | putative phage terminase                             |             | 48.0 | 27.5 | 29.5 | 48.6 | 0.012 | 0.007 | 1.000 | 0.005 |
|     | 4468 | putative phage capsid scaffolding protein            |             | 48.0 | 21.3 | 29.5 | 50.0 | 0.001 | 0.007 | 0.869 | 0.003 |
|     | 4472 | putative phage lysis holin                           |             | 46.7 | 21.3 | 30.5 | 50.0 | 0.001 | 0.016 | 0.741 | 0.006 |
|     | 4480 | putative phage baseplate assembly protein            |             | 42.7 | 22.5 | 29.0 | 40.0 | 0.010 | 0.043 | 0.866 | 0.102 |
|     | 11   | putative phage tail protein                          |             | 50.7 | 21.3 | 25.5 | 48.6 | 0.000 | 0.000 | 0.869 | 0.001 |
|     | 12   | putative phage tail protein                          |             | 53.3 | 22.5 | 30.0 | 50.0 | 0.000 | 0.000 | 0.741 | 0.004 |
| 13- |      |                                                      |             |      |      |      |      |       |       |       |       |
| 14  | 516  | phage-associated protein                             | <i>trkG</i> | 32.0 | 58.8 | 5.0  | 11.4 | 0.001 | 0.000 | 0.005 | 0.091 |
|     | 517  | putative transcriptional regulator                   |             | 29.3 | 58.8 | 5.0  | 11.4 | 0.000 | 0.000 | 0.013 | 0.091 |
|     | 518  | phage-associated protein                             |             | 35.0 | 49.1 | 14.0 | 14.3 | 0.008 | 0.000 | 0.001 | 1.000 |
|     | 520  | putative phage terminase                             |             | 26.7 | 38.8 | 4.5  | 10.0 | 0.126 | 0.000 | 0.011 | 0.137 |
|     | 522  | conserved hypothetical protein                       |             | 26.7 | 33.8 | 4.5  | 10.0 | 0.384 | 0.000 | 0.011 | 0.137 |
|     | 523  | putative phage morphogenesis protein                 |             | 25.4 | 20.8 | 10.0 | 11.4 | 0.380 | 0.000 | 0.010 | 0.820 |

|    |      |                                               |             |      |      |      |      |       |       |       |       |
|----|------|-----------------------------------------------|-------------|------|------|------|------|-------|-------|-------|-------|
|    | 525  | phage-associated protein                      |             | 32.0 | 31.3 | 5.0  | 10.0 | 1.000 | 0.000 | 0.002 | 0.156 |
|    | 530  | conserved hypothetical protein                |             | 26.7 | 27.5 | 5.0  | 10.0 | 1.000 | 0.000 | 0.011 | 0.156 |
|    | 532  | putative phage tail protein                   | <i>ynaA</i> | 28.0 | 27.5 | 5.0  | 8.6  | 1.000 | 0.000 | 0.003 | 0.376 |
|    | 542  | cytolethal distending toxin type IV subunit A | <i>cdtA</i> | 0.4  | 0.0  | 0.5  | 0.0  | 1.000 | 1.000 | 1.000 | 1.000 |
|    | 543  | cytolethal distending toxin type IV subunit B | <i>cdtB</i> | 0.4  | 0.0  | 2.5  | 1.4  | 1.000 | 0.031 | 0.351 | 1.000 |
|    | 544  | cytolethal distending toxin type IV subunit C | <i>cdtC</i> | 0.7  | 0.0  | 2.0  | 1.4  | 1.000 | 0.210 | 0.439 | 1.000 |
|    | 545  | putative protease/hydrolase                   |             | 14.2 | 8.5  | 15.5 | 65.7 | 0.149 | 0.718 | 0.000 | 0.000 |
| 17 | 1177 | putative phage tail protein                   |             | 56.0 | 26.3 | 28.0 | 55.7 | 0.000 | 0.001 | 1.000 | 0.001 |
|    | 1179 | putative phage tail protein                   |             | 52.0 | 21.3 | 24.0 | 51.4 | 0.000 | 0.001 | 1.000 | 0.001 |
|    | 1180 | phage-associated protein                      |             | 50.7 | 22.5 | 28.0 | 54.3 | 0.000 | 0.007 | 0.740 | 0.001 |
|    | 1181 | phage-associated protein                      |             | 54.7 | 22.5 | 24.0 | 48.6 | 0.000 | 0.000 | 0.508 | 0.003 |
|    | 1184 | phage-associated protein                      |             | 53.3 | 22.5 | 28.0 | 55.7 | 0.000 | 0.003 | 0.868 | 0.001 |
|    | 1185 | conserved hypothetical protein                |             | 52.0 | 22.5 | 26.7 | 37.1 | 0.000 | 0.002 | 0.095 | 0.212 |
| 20 | 4022 | putative adenine methylase                    |             | 5.3  | 18.8 | 12.0 | 31.4 | 0.014 | 0.245 | 0.000 | 0.005 |
|    | 4030 | phage-associated protein                      |             | 17.3 | 18.8 | 13.3 | 38.6 | 0.838 | 0.651 | 0.005 | 0.001 |
|    | 4038 | putative phage terminase                      |             | 17.3 | 18.8 | 13.3 | 37.1 | 0.838 | 0.651 | 0.009 | 0.001 |
|    | 4041 | putative phage tail protein                   |             | 6.7  | 0.0  | 0.0  | 0.0  | 0.025 | 0.058 | 0.059 | 1.000 |
|    | 4051 | phage-associated protein                      |             | 2.7  | 11.3 | 4.0  | 4.3  | 0.058 | 1.000 | 0.673 | 1.000 |

|    |      |                                                                |             |      |      |      |      |       |       |       |       |
|----|------|----------------------------------------------------------------|-------------|------|------|------|------|-------|-------|-------|-------|
|    | 4053 | phage-associated protein                                       |             | 4.0  | 12.5 | 6.7  | 2.9  | 0.081 | 0.719 | 1.000 | 0.444 |
|    | 4055 | phage-associated protein                                       |             | 1.3  | 0.0  | 0.0  | 1.4  | 0.484 | 1.000 | 1.000 | 0.483 |
|    | 4059 | phage-associated protein                                       |             | 14.7 | 1.3  | 4.0  | 34.3 | 0.002 | 0.046 | 0.007 | 0.000 |
| 30 | 3030 | Auf fimbriae major subunit precursor                           | <i>aufA</i> | 27.8 | 7.5  | 59.0 | 78.6 | 0.057 | 0.000 | 0.000 | 0.004 |
|    | 3032 | Auf fimbriae outer membrane usher protein                      | <i>aufC</i> | 27.8 | 7.5  | 59.0 | 81.4 | 0.057 | 0.000 | 0.000 | 0.001 |
|    | 3034 | Auf fimbriae minor subunit precursor                           | <i>aufE</i> | 27.8 | 7.5  | 59.0 | 81.4 | 0.057 | 0.000 | 0.000 | 0.001 |
|    | 3038 | Auf fimbrial protein                                           | <i>aufG</i> | 63.3 | 53.8 | 64.5 | 67.1 | 0.000 | 0.000 | 0.000 | 0.771 |
|    | 3040 | conserved hypothetical protein                                 |             | 84.8 | 59.4 | 80.0 | 88.6 | 0.007 | 0.000 | 0.000 | 0.145 |
| 40 | 2264 | putative Orn/Lys/Arg decarboxylase                             |             | 2.0  | 4.7  | 19.5 | 14.3 | 0.157 | 0.000 | 0.000 | 0.373 |
|    | 2271 | conserved hypothetical protein                                 |             | 3.3  | 3.8  | 17.0 | 11.4 | 0.769 | 0.000 | 0.007 | 0.339 |
|    | 2277 | conserved hypothetical protein                                 |             | 2.4  | 2.8  | 16.5 | 12.9 | 0.736 | 0.000 | 0.000 | 0.567 |
|    | 2291 | ethanolamine utilization protein                               | <i>eutE</i> | 1.3  | 0.0  | 17.0 | 14.3 | 0.601 | 0.000 | 0.000 | 0.708 |
|    | 2301 | response regulator of two-component signal transduction system |             | 22.8 | 11.3 | 40.0 | 31.4 | 0.008 | 0.000 | 0.132 | 0.252 |
|    | 2310 | conserved hypothetical protein                                 |             | 23.2 | 11.3 | 44.5 | 31.4 | 0.005 | 0.000 | 0.137 | 0.067 |
|    | 2314 | conserved hypothetical protein                                 |             | 60.0 | 58.5 | 77.0 | 61.4 | 0.826 | 0.000 | 0.896 | 0.018 |
| 42 | 2068 | putative Na(+)/H(+) exchanger                                  | <i>yjcE</i> | 16.4 | 21.7 | 48.5 | 80.0 | 0.201 | 0.000 | 0.000 | 0.000 |
|    | 2071 | C4-dicarboxylate transport system                              |             | 16.4 | 21.7 | 51.0 | 81.4 | 0.201 | 0.000 | 0.000 | 0.000 |

|  |      |                                                 |             |      |      |      |      |       |       |       |       |
|--|------|-------------------------------------------------|-------------|------|------|------|------|-------|-------|-------|-------|
|  |      | permease                                        |             |      |      |      |      |       |       |       |       |
|  | 2078 | EcoKI restriction-modification system protein   | <i>hsdS</i> | 6.0  | 6.6  | 5.0  | 42.9 | 0.822 | 0.716 | 0.000 | 0.000 |
|  | 2080 | conserved hypothetical protein                  |             | 14.4 | 20.8 | 36.5 | 55.7 | 0.136 | 0.000 | 0.000 | 0.007 |
|  | 2093 | invasion protein                                | <i>ibeA</i> | 11.7 | 6.6  | 17.5 | 72.9 | 0.162 | 0.062 | 0.000 | 0.000 |
|  | 2095 | glyoxylate carboligase                          | <i>gclA</i> | 11.9 | 6.6  | 18.5 | 72.9 | 0.122 | 0.037 | 0.000 | 0.000 |
|  | 2099 | putative carnitine transporter                  | <i>cniT</i> | 8.6  | 6.6  | 11.5 | 48.6 | 0.563 | 0.250 | 0.000 | 0.000 |
|  | 2101 | putative major facilitator familyefflux protein |             | 11.7 | 6.6  | 18.0 | 72.9 | 0.162 | 0.036 | 0.000 | 0.000 |
|  | 2103 | dihydroxyacetone kinase                         | <i>dhaK</i> | 11.9 | 6.6  | 18.0 | 72.9 | 0.122 | 0.048 | 0.000 | 0.000 |

<sup>A</sup>ORF = open reading frame locus from APEC O1 annotation.

<sup>B</sup>APEC = avian pathogenic *E. coli*; AFEC = avian fecal *E. coli*; UPEC = uropathogenic *E. coli*; NMEC = neonatal meningitis-associated *E. coli*.



**Supplementary Table 3. Prevalence of APEC O1 genomic island (GI)-associated genes according to serogroup and phylogenetic group.** Cells are colored based upon prevalence (blue = 0-25%, green = 25-50%, orange = 50-75%, red = 75-100%).

| GI | ORF <sup>A</sup> | Predicted protein                                                    | Gene           | Serogroup |      |      |      |      | Phylogenetic group |      |      |      |
|----|------------------|----------------------------------------------------------------------|----------------|-----------|------|------|------|------|--------------------|------|------|------|
|    |                  |                                                                      |                | O1        | O2   | O6   | O18  | O78  | A                  | B1   | B2   | D    |
| 1  | 1753             | putative endopeptidase                                               |                | 74.3      | 31.5 | 45.2 | 85.0 | 0.9  | 2.9                | 0.9  | 54.0 | 4.4  |
|    | 1756             | type VI secretion system protein                                     |                | 74.3      | 44.9 | 88.1 | 85.0 | 0.9  | 3.7                | 1.7  | 69.3 | 9.3  |
|    | 1757             | hemolysin co-regulated protein; type VI secretion system protein     | <i>hcp</i>     | 82.9      | 39.3 | 50.0 | 85.0 | 7.3  | 13.2               | 14.5 | 62.8 | 18.1 |
|    | 1761             | type VI secretion system protein                                     |                | 85.7      | 39.3 | 47.6 | 85.0 | 0.9  | 4.1                | 1.7  | 62.2 | 4.9  |
|    | 1767             | type VI secretion system ATPase                                      |                | 82.9      | 38.2 | 45.2 | 85.0 | 0.9  | 4.5                | 1.7  | 59.7 | 14.2 |
|    | 1770             | type VI secretion system protein, associated with macrophage killing |                | 80.0      | 34.8 | 45.2 | 85.0 | 1.8  | 4.1                | 1.7  | 58.8 | 15.2 |
|    | 1772             | type VI secretion system effector protein                            |                | 88.6      | 39.3 | 47.6 | 85.0 | 1.8  | 4.1                | 4.3  | 63.1 | 8.3  |
| 2  | 1712             | vacuolating autotransporter / temperature-sensitive hemagglutinin    | <i>vat/tsh</i> | 91.4      | 74.2 | 95.2 | 87.5 | 66.7 | 49.0               | 45.3 | 84.9 | 58.3 |
|    | 1713             | putative transcriptional regulator                                   |                | 88.6      | 66.3 | 95.2 | 85.0 | 0.9  | 5.8                | 6.8  | 79.5 | 43.6 |
|    | 1716             | conserved hypothetical protein                                       |                | 14.3      | 2.2  | 0.0  | 2.5  | 12.6 | 8.6                | 12.8 | 3.1  | 6.9  |
|    | 1717             | conserved hypothetical protein                                       |                | 20.0      | 4.5  | 0.0  | 5.0  | 13.5 | 9.1                | 19.7 | 6.0  | 8.3  |

|   |      |                                                      |             |       |      |       |       |      |      |      |      |      |
|---|------|------------------------------------------------------|-------------|-------|------|-------|-------|------|------|------|------|------|
|   | 1718 | conserved hypothetical protein                       |             | 8.6   | 1.1  | 0.0   | 0.0   | 0.9  | 0.8  | 3.4  | 1.4  | 1.5  |
|   | 1721 | conserved hypothetical protein                       |             | 22.9  | 4.5  | 0.0   | 5.0   | 12.6 | 9.5  | 15.4 | 5.4  | 7.4  |
|   | 1724 | conserved hypothetical protein                       |             | 20.0  | 4.5  | 0.0   | 0.0   | 1.8  | 4.5  | 6.8  | 5.1  | 5.4  |
| 3 | 1694 | putative attaching and effacing protein              | <i>eaeH</i> | 94.3  | 91.7 | 100.0 | 100.0 | 89.3 | 73.5 | 79.8 | 96.3 | 90.3 |
|   | 1696 | putative aldo/keto reductase                         |             | 94.3  | 77.8 | 97.6  | 86.2  | 1.8  | 12.3 | 13.1 | 92.2 | 67.2 |
|   | 1698 | putative LysR-like transcriptional regulator         |             | 91.4  | 58.3 | 95.2  | 86.2  | 1.8  | 11.7 | 11.9 | 91.0 | 45.5 |
| 4 | 1681 | putative site-specific recombinase                   |             | 100.0 | 88.0 | 97.1  | 88.5  | 0.0  | 16.9 | 18.2 | 89.5 | 41.8 |
|   | 1682 | putative LuxR-like transcriptional regulator         |             | 100.0 | 88.0 | 97.1  | 88.5  | 0.0  | 16.9 | 18.2 | 89.0 | 40.5 |
|   | 1683 | conserved hypothetical protein                       |             | 100.0 | 88.0 | 97.1  | 88.5  | 0.0  | 15.7 | 6.8  | 89.5 | 38.0 |
|   | 1684 | putative autotransporter                             |             | 100.0 | 88.0 | 94.1  | 88.5  | 0.0  | 16.9 | 18.2 | 88.1 | 40.5 |
| 5 | 1662 | sugar ABC transporter, permease component            |             | 82.4  | 48.0 | 5.9   | 92.3  | 0.0  | 15.7 | 70.5 | 42.0 | 64.6 |
|   | 1663 | sugar ABC transporter, transmembrane component       |             | 82.4  | 48.0 | 5.9   | 92.3  | 0.0  | 15.7 | 86.4 | 45.7 | 68.4 |
|   | 1664 | sugar ABC transporter, ATP-binding component         |             | 82.4  | 48.0 | 5.9   | 92.3  | 0.0  | 15.7 | 86.4 | 46.1 | 68.4 |
|   | 1665 | sugar ABC transporter, periplasmic-binding component |             | 82.4  | 48.0 | 5.9   | 92.3  | 0.0  | 15.7 | 79.5 | 45.7 | 65.8 |
| 8 | 4460 | phage-associated protein                             | <i>cox</i>  | 3.4   | 0.0  | 0.0   | 23.3  | 5.9  | 4.4  | 4.5  | 7.0  | 1.1  |
|   | 4464 | putative phage replication initiation protein        |             | 6.9   | 25.7 | 14.3  | 40.0  | 41.2 | 25.6 | 31.8 | 26.9 | 34.7 |

|     |      |                                               |             |      |      |      |      |       |      |      |      |      |
|-----|------|-----------------------------------------------|-------------|------|------|------|------|-------|------|------|------|------|
|     | 4467 | putative phage terminase                      |             | 10.3 | 25.7 | 16.7 | 46.7 | 29.4  | 25.6 | 34.1 | 31.5 | 37.9 |
|     | 4468 | putative phage capsid scaffolding protein     |             | 6.9  | 28.6 | 16.7 | 46.7 | 11.8  | 22.2 | 36.4 | 30.1 | 38.9 |
|     | 4472 | putative phage lysis holin                    |             | 6.9  | 28.6 | 16.7 | 46.7 | 5.9   | 21.1 | 38.6 | 30.1 | 40.0 |
|     | 4480 | putative phage baseplate assembly protein     |             | 6.9  | 28.6 | 16.7 | 33.3 | 17.6  | 21.1 | 36.4 | 27.6 | 35.8 |
|     | 11   | putative phage tail protein                   |             | 6.9  | 22.9 | 14.3 | 40.0 | 29.4  | 25.6 | 36.4 | 25.9 | 37.9 |
|     | 12   | putative phage tail protein                   |             | 6.9  | 28.6 | 16.7 | 46.7 | 29.4  | 26.7 | 40.9 | 30.1 | 38.9 |
| 13- |      |                                               |             |      |      |      |      |       |      |      |      |      |
| 14  | 516  | phage-associated protein                      | <i>trkG</i> | 6.9  | 14.3 | 0.0  | 6.7  | 23.5  | 28.9 | 45.5 | 7.0  | 30.5 |
|     | 517  | putative transcriptional regulator            |             | 6.9  | 14.3 | 0.0  | 6.7  | 23.5  | 32.2 | 45.5 | 5.9  | 28.4 |
|     | 518  | phage-associated protein                      |             | 6.7  | 0.0  | 5.9  | 12.5 | 100.0 | 27.6 | 33.3 | 8.6  | 23.8 |
|     | 520  | putative phage terminase                      |             | 6.9  | 14.3 | 0.0  | 6.7  | 23.5  | 18.9 | 36.4 | 5.6  | 25.3 |
|     | 522  | conserved hypothetical protein                |             | 6.9  | 14.3 | 0.0  | 6.7  | 23.5  | 17.8 | 36.4 | 4.5  | 25.3 |
|     | 523  | putative phage morphogenesis protein          |             | 0.0  | 0.0  | 5.9  | 12.5 | 100.0 | 17.2 | 25.0 | 7.5  | 14.3 |
|     | 525  | phage-associated protein                      |             | 6.9  | 14.3 | 0.0  | 6.7  | 23.5  | 17.8 | 36.4 | 4.9  | 27.4 |
|     | 530  | conserved hypothetical protein                |             | 6.9  | 14.3 | 0.0  | 6.7  | 23.5  | 15.6 | 34.1 | 4.2  | 24.2 |
|     | 532  | putative phage tail protein                   | <i>ynaA</i> | 6.9  | 14.3 | 0.0  | 6.7  | 23.5  | 14.4 | 34.1 | 4.2  | 26.3 |
|     | 542  | cytolethal distending toxin type IV subunit A | <i>cdtA</i> | 6.7  | 0.0  | 0.0  | 0.0  | 0.0   | 0.0  | 0.0  | 0.5  | 0.0  |
|     | 543  | cytolethal distending toxin type IV subunit B | <i>cdtB</i> | 6.7  | 0.0  | 2.9  | 0.0  | 0.0   | 3.4  | 0.0  | 2.7  | 0.0  |

|    |      |                                               |             |      |      |      |      |       |      |      |      |      |
|----|------|-----------------------------------------------|-------------|------|------|------|------|-------|------|------|------|------|
|    | 544  | cytolethal distending toxin type IV subunit C | <i>cdtC</i> | 6.7  | 0.0  | 2.9  | 0.0  | 0.0   | 3.4  | 0.0  | 2.1  | 0.0  |
|    | 545  | putative protease/hydrolase                   |             | 0.0  | 25.0 | 2.9  | 58.3 | 100.0 | 31.0 | 8.3  | 29.9 | 26.2 |
| 17 | 1177 | putative phage tail protein                   |             | 14.3 | 37.0 | 5.9  | 50.0 | 29.4  | 31.5 | 40.0 | 34.5 | 37.8 |
|    | 1179 | putative phage tail protein                   |             | 14.3 | 29.6 | 5.9  | 40.9 | 29.4  | 27.4 | 34.3 | 30.1 | 36.5 |
|    | 1180 | phage-associated protein                      |             | 14.3 | 37.0 | 5.9  | 50.0 | 11.8  | 23.3 | 37.1 | 34.5 | 36.5 |
|    | 1181 | phage-associated protein                      |             | 14.3 | 37.0 | 5.9  | 45.5 | 41.2  | 28.8 | 37.1 | 28.6 | 35.1 |
|    | 1184 | phage-associated protein                      |             | 14.3 | 33.3 | 5.9  | 50.0 | 29.4  | 28.8 | 37.1 | 34.0 | 36.5 |
|    | 1185 | conserved hypothetical protein                |             | 14.3 | 37.0 | 5.9  | 36.4 | 23.5  | 24.7 | 37.1 | 28.2 | 35.1 |
| 20 | 4022 | putative adenine methylase                    |             | 9.5  | 7.4  | 11.8 | 40.9 | 0.0   | 21.9 | 2.9  | 20.9 | 2.7  |
|    | 4030 | phage-associated protein                      |             | 14.3 | 14.8 | 11.8 | 45.5 | 5.9   | 23.3 | 2.9  | 20.9 | 13.5 |
|    | 4038 | putative phage terminase                      |             | 14.3 | 14.8 | 11.8 | 45.5 | 5.9   | 23.3 | 2.9  | 23.8 | 13.5 |
|    | 4041 | putative phage tail protein                   |             | 4.8  | 7.4  | 0.0  | 0.0  | 0.0   | 0.0  | 0.0  | 1.5  | 2.7  |
|    | 4051 | phage-associated protein                      |             | 4.8  | 3.7  | 5.9  | 0.0  | 0.0   | 13.7 | 0.0  | 4.4  | 0.0  |
|    | 4053 | phage-associated protein                      |             | 4.8  | 3.7  | 5.9  | 9.1  | 0.0   | 17.8 | 0.0  | 5.3  | 2.7  |
|    | 4055 | phage-associated protein                      |             | 4.8  | 0.0  | 0.0  | 9.1  | 0.0   | 0.0  | 0.0  | 2.9  | 0.0  |
|    | 4059 | phage-associated protein                      |             | 9.5  | 11.1 | 0.0  | 45.5 | 5.9   | 2.7  | 0.0  | 19.4 | 9.5  |
| 30 | 3030 | Auf fimbriae major subunit precursor          | <i>aufA</i> | 77.1 | 65.3 | 95.2 | 86.2 | 1.8   | 6.2  | 6.0  | 74.8 | 33.6 |
|    | 3032 | Auf fimbriae outer membrane usher protein     | <i>aufC</i> | 77.1 | 65.3 | 95.2 | 86.2 | 1.8   | 6.8  | 6.0  | 75.1 | 33.6 |

|    |      |                                                                |             |      |      |       |       |      |      |      |      |      |
|----|------|----------------------------------------------------------------|-------------|------|------|-------|-------|------|------|------|------|------|
|    | 3034 | Auf fimbriae minor subunit precursor                           | <i>aufE</i> | 77.1 | 65.3 | 95.2  | 86.2  | 1.8  | 6.8  | 6.0  | 75.1 | 33.6 |
|    | 3038 | Auf fimbrial protein                                           | <i>aufG</i> | 80.0 | 56.9 | 95.2  | 100.0 | 96.4 | 63.6 | 79.8 | 68.5 | 34.3 |
|    | 3040 | conserved hypothetical protein                                 |             | 91.4 | 81.9 | 100.0 | 100.0 | 98.2 | 67.9 | 86.9 | 93.5 | 59.0 |
| 40 | 2264 | putative Orn/Lys/Arg decarboxylase                             |             | 77.1 | 16.9 | 0.0   | 5.0   | 0.9  | 4.1  | 1.7  | 18.5 | 3.9  |
|    | 2271 | conserved hypothetical protein                                 |             | 71.4 | 16.9 | 0.0   | 2.5   | 3.6  | 4.5  | 0.9  | 18.5 | 2.5  |
|    | 2277 | conserved hypothetical protein                                 |             | 80.0 | 18.0 | 0.0   | 2.5   | 0.0  | 1.2  | 0.9  | 18.5 | 5.4  |
|    | 2291 | ethanolamine utilization protein                               | <i>eutE</i> | 80.0 | 15.7 | 0.0   | 2.5   | 0.0  | 1.2  | 0.9  | 18.2 | 2.0  |
|    | 2301 | response regulator of two-component signal transduction system |             | 82.9 | 47.2 | 50.0  | 32.5  | 1.8  | 7.8  | 7.7  | 39.8 | 42.6 |
|    | 2310 | conserved hypothetical protein                                 |             | 71.4 | 49.4 | 59.5  | 35.0  | 1.8  | 7.4  | 7.7  | 42.9 | 42.2 |
|    | 2314 | conserved hypothetical protein                                 |             | 80.0 | 80.9 | 88.1  | 52.5  | 31.5 | 52.7 | 59.8 | 69.6 | 71.6 |
| 42 | 2068 | putative Na(+)/H(+) exchanger                                  | <i>yjcE</i> | 48.6 | 34.8 | 71.4  | 85.0  | 2.7  | 8.8  | 6.0  | 69.0 | 13.2 |
|    | 2071 | C4-dicarboxylate transport system permease                     |             | 48.6 | 34.8 | 71.4  | 85.0  | 2.7  | 9.2  | 6.0  | 70.5 | 13.2 |
|    | 2078 | EcoKI restriction-modification system protein                  | <i>hsdS</i> | 20.0 | 14.6 | 0.0   | 77.5  | 0.0  | 4.2  | 0.0  | 19.3 | 2.5  |
|    | 2080 | conserved hypothetical protein                                 |             | 25.7 | 29.2 | 66.7  | 87.5  | 3.6  | 9.2  | 13.7 | 42.0 | 19.1 |
|    | 2093 | invasion protein                                               | <i>ibeA</i> | 22.9 | 18.0 | 4.8   | 82.5  | 0.0  | 3.8  | 0.0  | 42.9 | 6.9  |
|    | 2095 | glyoxylate carboligase                                         | <i>gclA</i> | 22.9 | 18.0 | 4.8   | 82.5  | 0.0  | 3.8  | 0.0  | 43.2 | 7.8  |
|    | 2099 | putative carnitine transporter                                 | <i>cniT</i> | 20.0 | 16.9 | 2.4   | 82.5  | 0.0  | 1.7  | 0.0  | 31.0 | 5.9  |

|  |      |                                                  |             |      |      |     |      |     |     |     |      |     |
|--|------|--------------------------------------------------|-------------|------|------|-----|------|-----|-----|-----|------|-----|
|  | 2101 | putative major facilitator familytefflux protein |             | 22.9 | 18.0 | 4.8 | 82.5 | 0.0 | 3.8 | 0.0 | 42.9 | 7.4 |
|  | 2103 | dihydroxyacetone kinase                          | <i>dhaK</i> | 22.9 | 18.0 | 4.8 | 82.5 | 0.0 | 3.8 | 0.0 | 43.2 | 7.4 |

<sup>A</sup>ORF = open reading frame locus from APEC O1 annotation.
